# Supplementary material for: Palladium modified porous silicon as multi-functional MALDI chip for serum peptide detection
Source: Royal Society of Chemistry journal article supplement (doi:10.1039/c6an02165d), 2017-01-01
Supplement: c6an02165d1.pdf [file c6an02165d1.pdf]

## Supporting Information

### **Palladium Modified Porous Silicon as Multi-functional MALDI chip for Serum Peptides Detection**

**Xiao Li †, Xiaoming Chen†, Jie Tan†, Xiao Liang\*§ and Jianmin  
Wu\*†**

†Institute of Microanalytical System, Department of Chemistry, Zhejiang University, Hangzhou, 310058, China

§Department of General Surgery, Sir Run Run Shaw Hospital, School of Medicine, Zhejiang University, Hangzhou, 310058

Email address: [wjm-st1@zju.edu.cn](mailto:wjm-st1@zju.edu.cn)

## Supplementary Figures

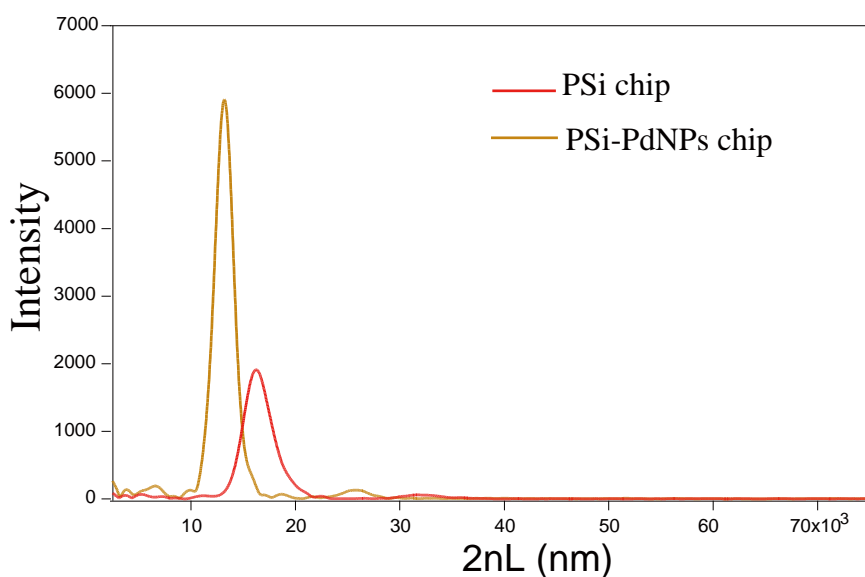

Fig. S1 Fourier transform reflectometric interference spectran (FT-RIS) of PSi chip and PSi-PdNPs chip. The blue shift of FT-RIS peak indicated the refractive index of porous silicon layer significantly decreased due to the coating of PdNPs on PSi surface [1].

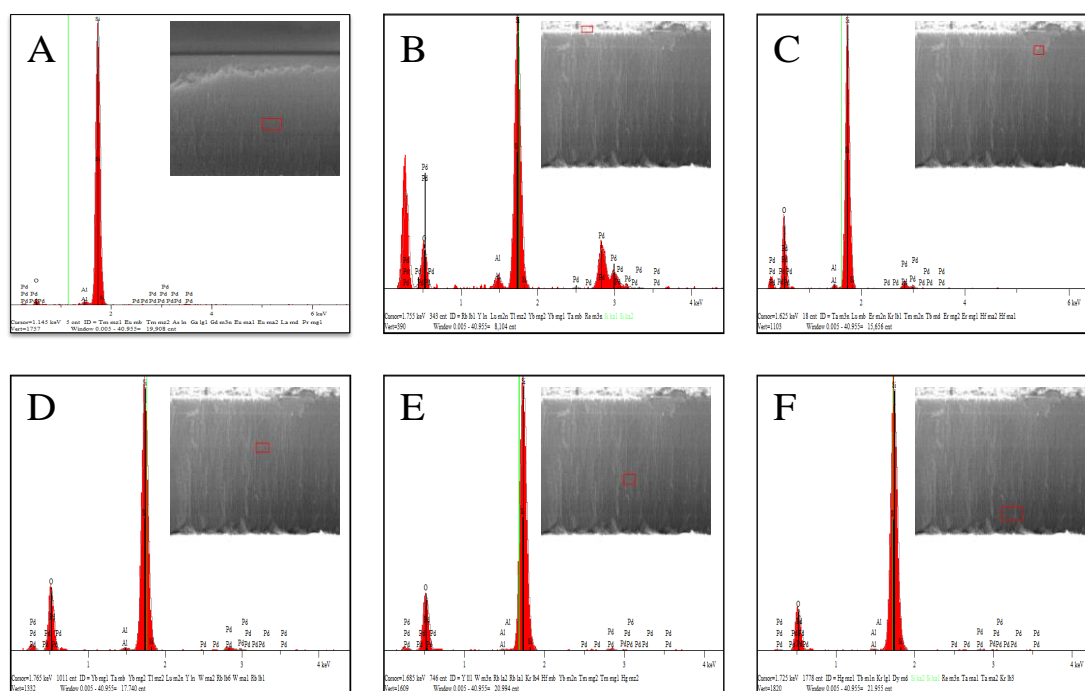

Fig. S2 Cross-sectional EDS profiling of PSi chip (A) and PSi-PdNPs chip (B, C, D, E, F) at different positions highlighted with rectangular mark. The content of the palladium element in PSi chip is 0.000% (A), while in the PSi-PdNPs chip the content is 40.068% (B), 9.007% (C), 5.480% (D), 2.951% (E) and 1.878% (F) from top surface to the bottom field.

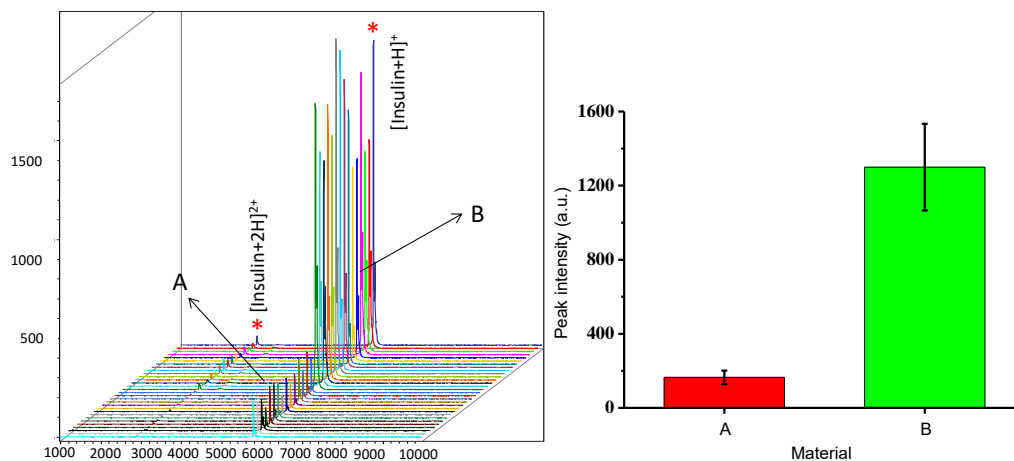

Fig. S3 Mass spectra and the peak intensity of the insulin samples obtained on the MALDI plate (A) and the PSi-PdNPs chip (B). 2  $\mu$ L aliquot of the insulin sample (2.4 nmol/L in PBS) was spotted on the conventional MALDI-plate and PSi-PdNPs chip, respectively. The test was repeated for 15 times.

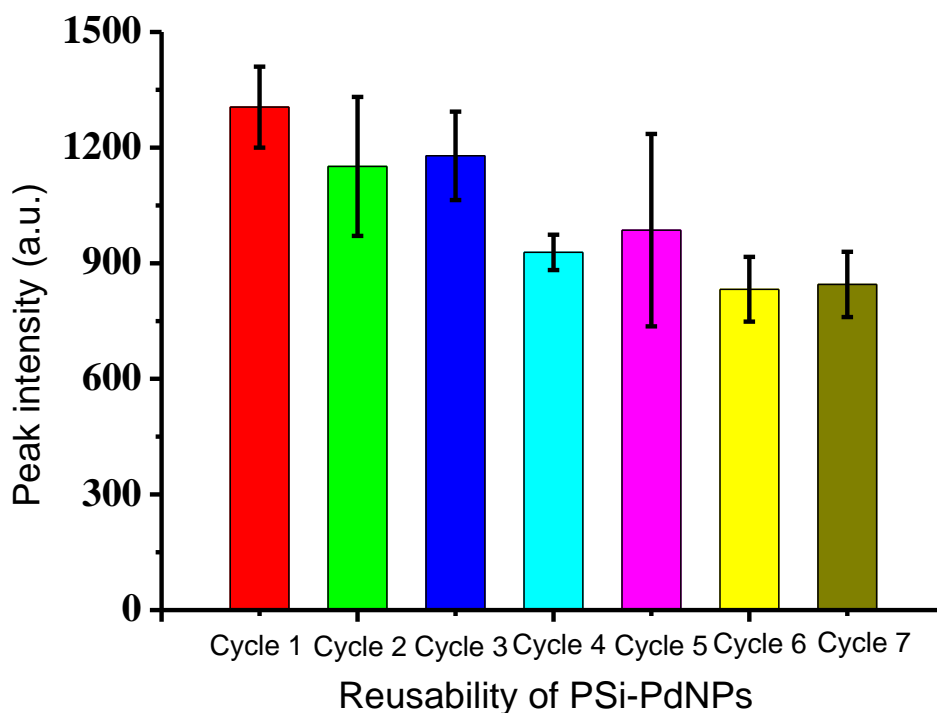

Fig. S4 Reusability of the PSi-PdNPs chip during the detection of insulin samples. In each cycle, 2  $\mu$ L aliquot of the insulin sample (2.4 nmol/L in PBS) was spotted on the chip. After MS detection, the chip was treated with ultrasound in the eluent ( $\text{H}_2\text{O}$ : ACN: TFA = 50:50: 0.1, v/v/v) for 1 min and thereafter dried with  $\text{N}_2$  gas. The test was repeated for 5 times in each cycle.

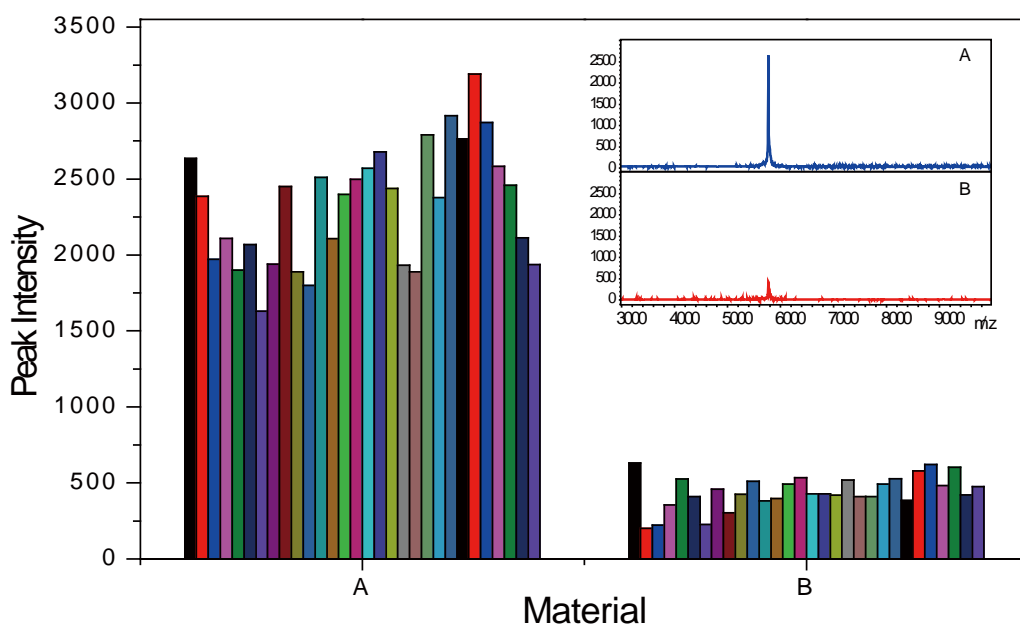

Fig. S5 Mass spectra of the insulin samples obtained on different PSi materials. 2  $\mu\text{L}$  aliquot of the insulin sample was spotted on n-type PSi chip (A) and on n-type PSi-PdNPs chip (B), respectively. The test was repeated for 30 times on each chip.

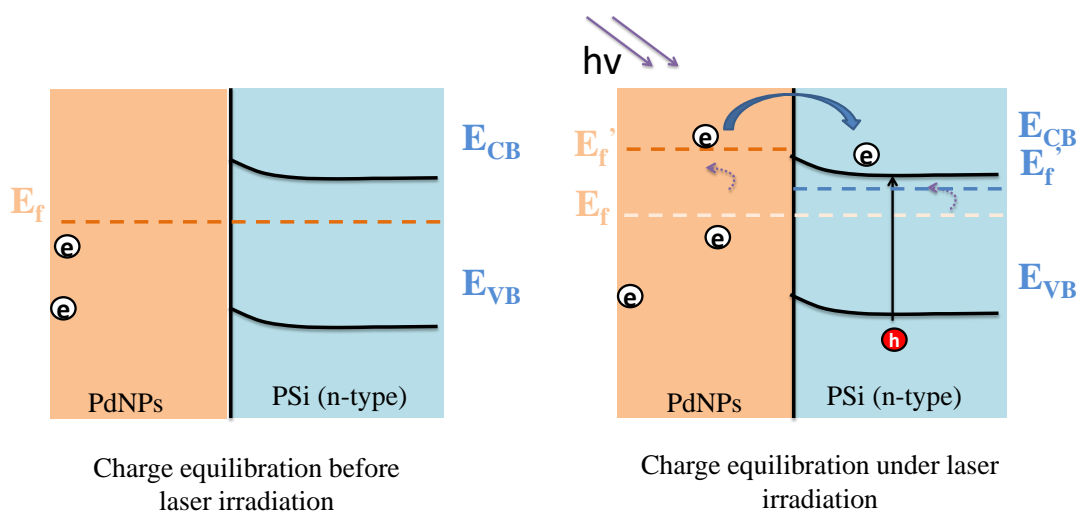

Fig. S6 Charge transfer diagram for PdNPs in contact with n-type PSi semiconductor under laser irradiation.

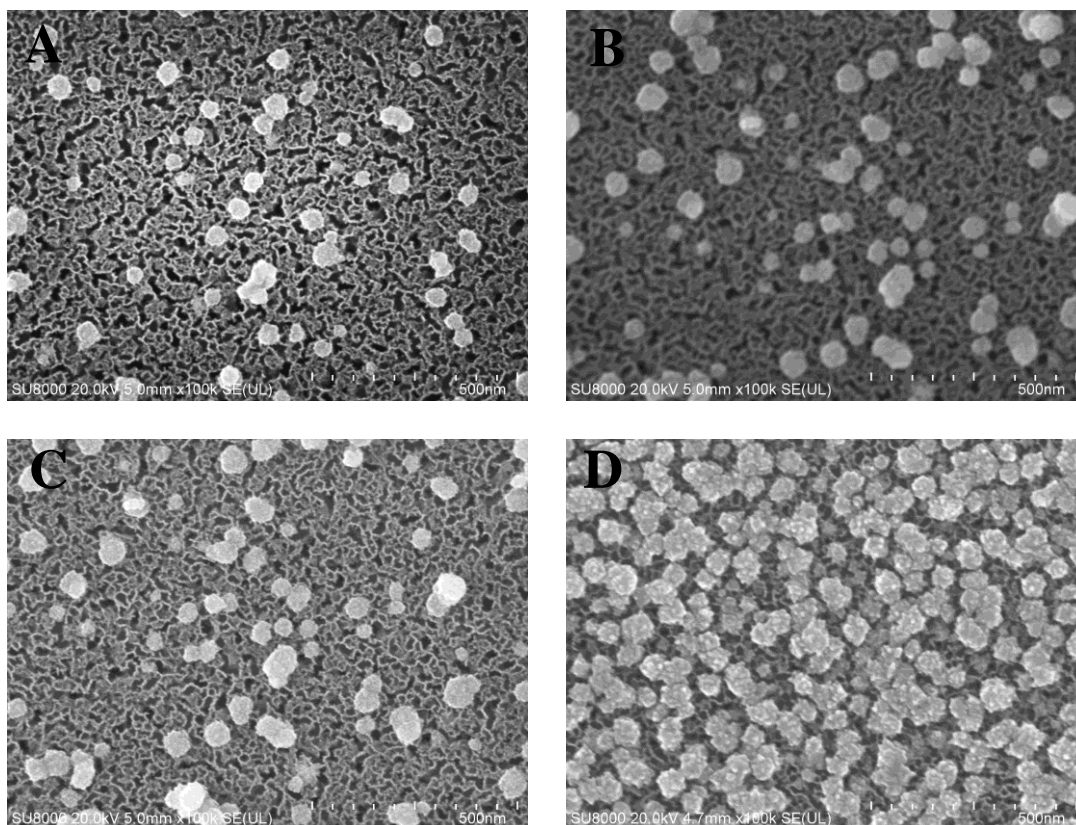

Fig. S7 The top view SEM image of PSI-PdNPs chip. The time for electrodeposition of PdNPs was controlled at (A) 1 min, (B) 10 min, (C) 15 min and (D) 20 min, respectively. The scale bar in the SEM image refers to 500 nm.

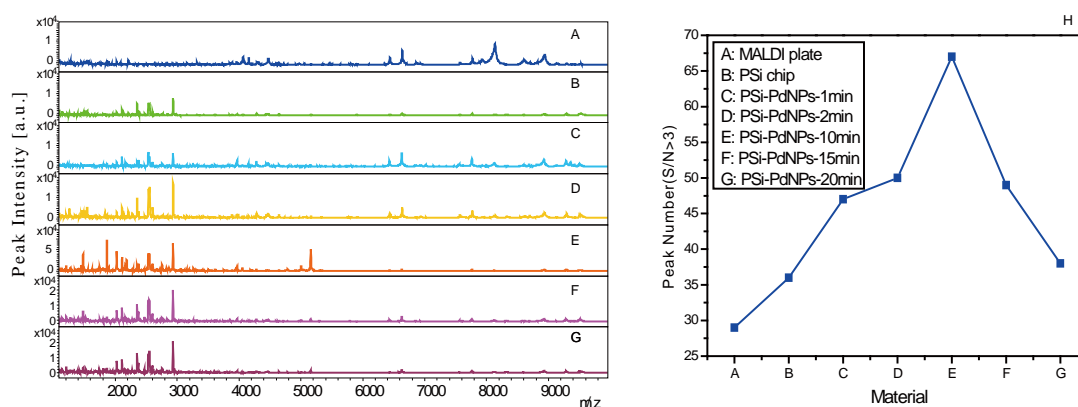

Fig. S8 Serum peptide spectra obtained on PSI-PdNPs chips with different Pd deposition time (A) standard MALDI plate, (B) PSI chip, (C) PSI-PdNPs chip (1 min), (D) PSI-PdNPs chip (2 min), (E) PSI-PdNPs chip (10 min), (F) PSI-PdNPs chips (15 min), (G) PSI-PdNPs chip (20 min), (H) The number of MS peaks with  $S/N > 3$  obtained under different conditions corresponding to A-G.

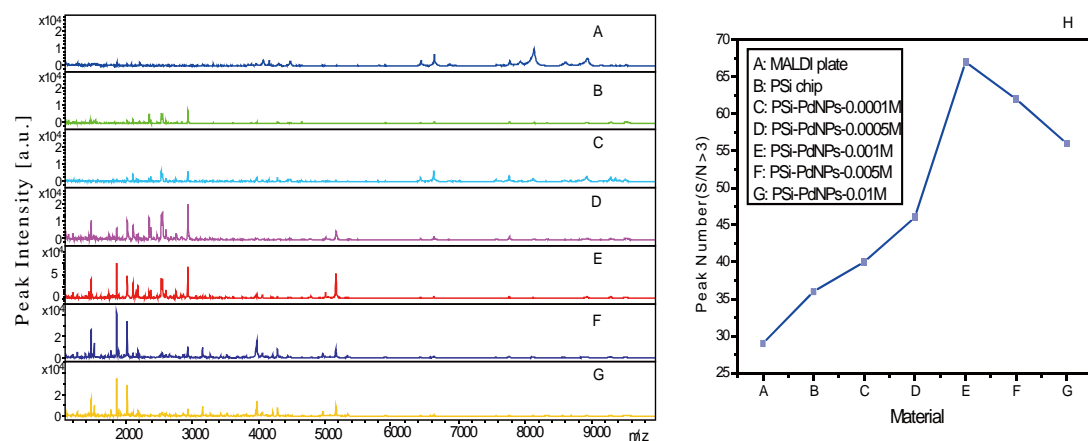

Fig. S9 Serum peptide spectra obtained on PSi-PdNPs chips prepared at different concentration of PdCl<sub>2</sub> solution. (A) standard MALDI plate, (B) PSi chip, (C) PSi-PdNPs chip ( $c = 0.0001 \text{ mol L}^{-1}$ ), (D) PSi-PdNPs chip ( $c = 0.0005 \text{ mol L}^{-1}$ ), (E) PSi-PdNPs chip ( $c = 0.001 \text{ mol L}^{-1}$ ), (F) PSi-PdNPs chip ( $c = 0.005 \text{ mol L}^{-1}$ ), (G) PSi-PdNPs chip ( $c = 0.01 \text{ mol L}^{-1}$ ), (H) The number of MS peaks with S/N > 3 obtained under different conditions corresponding to A-G.

**Table. S1 The number of detected peak (S/N > 3) obtained on different chip**

| MALDI    | PSi chip | PSi-GNPs chip | PSi-PdNPs chip |
|----------|----------|---------------|----------------|
| —        | 1016.416 | —             | 1016.972       |
| —        | —        | 1059.473      | 1059.104       |
| —        | 1070.652 | —             | —              |
| 1076.428 | 1076.692 | 1076.578      | 1076.871       |
| —        | —        | —             | 1275.226       |
| —        | —        | 1483.746      | 1483.325       |
| —        | —        | —             | 1530.559       |
| —        | —        | —             | 1545.021       |
| —        | —        | 1739.368      | —              |
| —        | —        | —             | 1778.781       |
| 1865.914 | —        | 1865.624      | 1865.644       |
| —        | —        | —             | 1887.848       |
| —        | —        | —             | 1896.655       |
| —        | —        | —             | 1933.949       |
| —        | —        | —             | 1985.498       |
| —        | —        | 2005.291      | 2005.018       |
| 2023.583 | 2023.058 | 2023.678      | 2023.023       |
| —        | —        | —             | 2044.146       |
| —        | —        | —             | 2065.478       |
| —        | —        | 2083.344      | 2083.925       |
| —        | —        | —             | 2168.586       |
| —        | —        | 2113.914      | —              |
| —        | —        | 2184.754      | 2184.46        |
| —        | —        | 2209.088      | —              |
| —        | 2355.394 | 2355.298      | 2355.911       |
| —        | 2539.553 | —             | 2538.734       |
| —        | 2556.365 | —             | 2555.224       |
| —        | 2934.9   | 2934.687      | 2934.968       |
| —        | —        | 3159.215      | 3159.23        |
| 3219.745 | 3219.507 | —             | —              |
| —        | —        | —             | 3274.383       |
| 3318.856 | 3318.72  | 3318.347      | 3431.711       |
| —        | —        | —             | 3524.496       |
| —        | —        | —             | 3814.057       |
| 3886.417 | 3886.244 | 3886.365      | —              |
| —        | —        | 3957.801      | 3957.498       |
| 3975.84  | 3975.524 | 3971.808      | 3975.26        |
| —        | —        | —             | 4038.472       |
| —        | —        | —             | 4055.09        |
| 4066.805 | 4066.81  | 4066.311      | —              |
| —        | —        | —             | 4113.819       |
| —        | —        | 4130.634      | 4130.634       |

|          |          |          |          |
|----------|----------|----------|----------|
| 4155.896 | 4155.14  | 4155.89  | 4155.997 |
| —        | —        | —        | 4210.199 |
| 4283.92  | 4283.61  | 4283.019 | 4283.695 |
| 4302.685 | 4302.555 | 4302.655 | 4302.662 |
| —        | —        | —        | 4326.461 |
| —        | 4438.435 | 4438.231 | 4438.654 |
| —        | —        | 4468.639 | 4468.243 |
| 4647.548 | 4646.833 | 4646.153 | 4646.576 |
| —        | —        | —        | 4788.262 |
| —        | —        | —        | 4966.26  |
| —        | —        | —        | 5005.478 |
| —        | —        | —        | 5046.442 |
| —        | —        | —        | 5069.818 |
| —        | —        | —        | 5161.435 |
| —        | —        | —        | 5202.996 |
| —        | —        | 5337.098 | 5337.914 |
| —        | 5905.674 | 5905.128 | 5905.315 |
| 6434.751 | 6434.936 | 6434.551 | 6434.174 |
| 6635.051 | 6634.45  | 6634.058 | 6634.969 |
| 6855.356 | —        | —        | —        |
| —        | 6873.363 | —        | —        |
| 6935.702 | 6935.086 | —        | —        |
| 7023.054 | 7022.723 | 7022.781 | 7022.874 |
| 7567.681 | 7566.098 | 7565.29  | 7565.73  |
| 7771.783 | 7769.949 | 7769.268 | 7769.83  |
| —        | 7938.236 | 7938.021 | —        |
| 8130.24  | 8129.428 | 8129.228 | 8129.513 |
| 8605.477 | 8605.511 | 8605.142 | 8604.57  |
| —        | —        | 8690.722 | 8690.728 |
| —        | —        | —        | 8888.575 |
| —        | —        | 8932.871 | 8932.278 |
| 8935.414 | 8935.363 | 8934.591 | 8934.911 |
| 9133.921 | 9132.631 | 9133.462 | 9133.561 |
| 9292.257 | 9291.207 | 9291.217 | 9291.06  |
| 9367.166 | 9365.203 | —        | 9366.754 |
| 9421.732 | —        | —        | 9421.287 |
| 9496.896 | 9495.349 | 9495.12  | 9495.974 |
| —        | 9515.321 | —        | 9512.695 |

## Reference

1. J. Feng, W. Zhao, B. Su, J. Wu, Biosensors and Bioelectronics 2011, 30: 21–27.
